# Supplementary material for: Obesity Is Indirectly Associated with Sudden Cardiac Arrest through Various Risk Factors
Source: MDPI journal article supplement (doi:10.3390/jcm12052068), 2023-03-06
Supplement: s1 [file s1]

## Obesity is Indirectly Associated with Sudden Cardiac Arrest through Various Risk Factors

**Supplementary Table S1.** Baseline characteristics of patients with and without SCA.

|                                           | SCA               |                | p-value |
|-------------------------------------------|-------------------|----------------|---------|
|                                           | No<br>4,040,071   | Yes<br>16,352  |         |
| <b>Male</b>                               | 2,221,898 (55.0%) | 11,633 (71.1%) | < 0.001 |
| <b>Age (years)</b>                        | 47.0 ± 14.1       | 62.0 ± 13.2    | < 0.001 |
| <b>Hypertension</b>                       | 1,082,382 (26.8%) | 9,331 (57.1%)  | < 0.001 |
| <b>Diabetes mellitus</b>                  | 349,134 (8.6%)    | 4,264 (26.1%)  | < 0.001 |
| <b>Dyslipidemia</b>                       | 732,983 (18.1%)   | 4,610 (28.2%)  | < 0.001 |
| <b>Chronic kidney disease</b>             | 275,854 (6.8%)    | 2,740 (16.8%)  | < 0.001 |
| <b>Body mass index (kg/m<sup>2</sup>)</b> | 23.7 ± 3.2        | 23.8 ± 3.4     | 0.138   |
| <b>Waist circumference (cm)</b>           | 80.2 ± 9.5        | 83.5 ± 8.9     | < 0.001 |
| <b>Smoking</b>                            |                   |                | < 0.001 |
| Never-smoker                              | 2,399,679 (59.4%) | 7,916 (48.4%)  |         |
| Ex-smoker                                 | 581,485 (14.4%)   | 3,128 (19.1%)  |         |
| Current-smoker                            | 1,058,907 (26.2%) | 5,308 (32.5%)  |         |
| <b>Alcohol consumption</b>                |                   |                | < 0.001 |
| Non-drinker                               | 2,077,053 (51.4%) | 9,534 (58.3%)  |         |
| Mild-drinker                              | 1,641,427 (40.6%) | 5,263 (32.2%)  |         |
| Heavy-drinker                             | 321,591 (8.0%)    | 1,555 (9.5%)   |         |
| <b>Regular exercise</b>                   | 733,609 (18.2%)   | 3,148 (19.3%)  | < 0.001 |

|                                         |                 |               |         |
|-----------------------------------------|-----------------|---------------|---------|
| <b>Income (lowest 20%)</b>              | 704,587 (17.4%) | 3,075 (18.8%) | < 0.001 |
| <b>Glucose (mg/dL)</b>                  | 97.2 ± 23.8     | 110.0 ± 41.5  | < 0.001 |
| <b>Systolic blood pressure (mmHg)</b>   | 122.4 ± 15.0    | 129.3 ± 17.2  | < 0.001 |
| <b>Diastolic blood pressure (mmHg)</b>  | 76.3 ± 10.0     | 78.9 ± 11.0   | < 0.001 |
| <b>Cholesterol (mg/dL)</b>              | 195.3 ± 41.1    | 195.1 ± 44.3  | 0.549   |
| <b>High-density lipoprotein (mg/dL)</b> | 56.5 ± 32.9     | 53.6 ± 30.9   | < 0.001 |
| <b>Low-density lipoprotein (mg/dL)</b>  | 121.2 ± 214.2   | 115.0 ± 97.8  | < 0.001 |
| <b>eGFR (mL/min/1.73m<sup>2</sup>)</b>  | 87.6 ± 44.9     | 80.4 ± 34.7   | < 0.001 |

---

eGFR: estimated glomerular filtration rate; SCA: sudden cardiac arrest.

**Supplementary Table S2.** Impact of BMI and waist circumference on SCA according to metabolic syndrome

|                                                                                                         | n         | SCA   | Follow-up duration<br>(person-years) | Incidence | Hazard ratio with 95% confidence interval |                    |                    |                    |                    |                    |
|---------------------------------------------------------------------------------------------------------|-----------|-------|--------------------------------------|-----------|-------------------------------------------|--------------------|--------------------|--------------------|--------------------|--------------------|
|                                                                                                         |           |       |                                      |           | Univariate                                | Multivariate 1     | Multivariate 2     | Multivariate 3     | Multivariate 4     | Multivariate 5     |
| Participants who have all three diagnosis of hypertension, diabetes mellitus, and dyslipidemia          |           |       |                                      |           |                                           |                    |                    |                    |                    |                    |
| BMI                                                                                                     |           |       |                                      |           |                                           |                    |                    |                    |                    |                    |
| BMI < 18.5                                                                                              | 427       | 16    | 2,819                                | 5.68      | 2.02 (1.22 – 3.34)                        | 1.78 (1.08 – 2.95) | 1.75 (1.06 – 2.90) | 1.75 (1.06 – 2.90) | 1.79 (1.08 – 2.97) | 1.79 (1.08 – 2.95) |
| 18.5 ≤ BMI < 23                                                                                         | 13,324    | 291   | 102,147                              | 2.85      | 1 (reference)                             | 1 (reference)      | 1 (reference)      | 1 (reference)      | 1 (reference)      | 1 (reference)      |
| 23 ≤ BMI < 25                                                                                           | 18,455    | 282   | 146,315                              | 1.93      | 0.68 (0.57 – 0.80)                        | 0.70 (0.60 – 0.83) | 0.71 (0.61 – 0.84) | 0.71 (0.61 – 0.84) | 0.71 (0.60 – 0.83) | 0.70 (0.60 – 0.83) |
| 25 ≤ BMI < 30                                                                                           | 36,720    | 458   | 295,317                              | 1.55      | 0.54 (0.47 – 0.63)                        | 0.64 (0.55 – 0.74) | 0.65 (0.56 – 0.75) | 0.65 (0.56 – 0.75) | 0.64 (0.55 – 0.74) | 0.62 (0.53 – 0.72) |
| 30 ≤ BMI                                                                                                | 7,662     | 99    | 62,141                               | 1.59      | 0.56 (0.44 – 0.70)                        | 0.88 (0.69 – 1.10) | 0.89 (0.71 – 1.12) | 0.89 (0.71 – 1.12) | 0.87 (0.69 – 1.10) | 0.84 (0.66 – 1.06) |
| Waist circumference (male / female; cm)                                                                 |           |       |                                      |           |                                           |                    |                    |                    |                    |                    |
| < 80 / 75                                                                                               | 6,448     | 129   | 50,122                               | 2.57      | 1.63 (1.32 – 2.02)                        | 1.66 (1.35 – 2.06) | 1.64 (1.32 – 2.03) | 1.64 (1.32 – 2.03) | 1.66 (1.34 – 2.06) | 1.69 (1.37 – 2.09) |
| – 85 / 80                                                                                               | 12,903    | 206   | 102,052                              | 2.02      | 1.27 (1.06 – 1.53)                        | 1.27 (1.06 – 1.53) | 1.27 (1.06 – 1.53) | 1.27 (1.06 – 1.53) | 1.28 (1.07 – 1.55) | 1.30 (1.08 – 1.56) |
| – 90 / 85                                                                                               | 19,395    | 246   | 155,024                              | 1.59      | 1 (reference)                             | 1 (reference)      | 1 (reference)      | 1 (reference)      | 1 (reference)      | 1 (reference)      |
| – 95 / 90                                                                                               | 17,877    | 254   | 142,385                              | 1.78      | 1.13 (0.94 – 1.34)                        | 1.12 (0.94 – 1.33) | 1.11 (0.93 – 1.32) | 1.11 (0.93 – 1.32) | 1.11 (0.93 – 1.33) | 1.10 (0.93 – 1.32) |
| – 100 / 95                                                                                              | 11,308    | 164   | 90,481                               | 1.81      | 1.14 (0.94 – 1.39)                        | 1.19 (0.98 – 1.45) | 1.19 (0.97 – 1.45) | 1.19 (0.97 – 1.45) | 1.17 (0.96 – 1.42) | 1.15 (0.94 – 1.40) |
| ≥ 100 / 95                                                                                              | 8,657     | 147   | 68,674                               | 2.14      | 1.35 (1.10 – 1.66)                        | 1.49 (1.21 – 1.83) | 1.47 (1.20 – 1.80) | 1.47 (1.20 – 1.80) | 1.44 (1.18 – 1.77) | 1.41 (1.15 – 1.74) |
| Counterpart (who have diagnosis none, one, or two of hypertension, diabetes mellitus, and dyslipidemia) |           |       |                                      |           |                                           |                    |                    |                    |                    |                    |
| BMI                                                                                                     |           |       |                                      |           |                                           |                    |                    |                    |                    |                    |
| BMI < 18.5                                                                                              | 148,033   | 814   | 1,194,167                            | 0.68      | 1.54 (1.43 – 1.66)                        | 1.73 (1.61 – 1.87) | 1.64 (1.52 – 1.76) | 1.78 (1.65 – 1.92) | 1.79 (1.66 – 1.93) | 1.79 (1.66 – 1.93) |
| 18.5 ≤ BMI < 23                                                                                         | 1,566,329 | 5,725 | 12,864,605                           | 0.45      | 1 (reference)                             | 1 (reference)      | 1 (reference)      | 1 (reference)      | 1 (reference)      | 1 (reference)      |
| 23 ≤ BMI < 25                                                                                           | 982,939   | 3,642 | 8,102,935                            | 0.45      | 1.01 (0.97 – 1.05)                        | 0.84 (0.81 – 0.87) | 0.87 (0.83 – 0.90) | 0.81 (0.77 – 0.84) | 0.81 (0.77 – 0.84) | 0.78 (0.75 – 0.82) |
| 25 ≤ BMI < 30                                                                                           | 1,145,678 | 4,457 | 9,447,808                            | 0.47      | 1.06 (1.02 – 1.10)                        | 0.88 (0.85 – 0.92) | 0.92 (0.89 – 0.96) | 0.81 (0.78 – 0.84) | 0.80 (0.77 – 0.84) | 0.75 (0.72 – 0.78) |
| 30 ≤ BMI                                                                                                | 136856    | 568   | 1,127,123                            | 0.50      | 1.13 (1.04 – 1.23)                        | 1.31 (1.20 – 1.43) | 1.34 (1.23 – 1.46) | 1.07 (0.98 – 1.17) | 1.06 (0.97 – 1.16) | 0.94 (0.87 – 1.03) |
| Waist circumference (male / female; cm)                                                                 |           |       |                                      |           |                                           |                    |                    |                    |                    |                    |
| < 80 / 75                                                                                               | 1,484,444 | 4,157 | 12,233,853                           | 0.34      | 0.64 (0.61 – 0.67)                        | 1.11 (1.07 – 1.17) | 1.08 (1.03 – 1.13) | 1.3 (1.24 – 1.36)  | 1.22 (1.16 – 1.27) | 1.16 (1.11 – 1.22) |
| – 85 / 80                                                                                               | 952,713   | 3,459 | 7,843,613                            | 0.44      | 0.83 (0.79 – 0.87)                        | 0.97 (0.93 – 1.02) | 0.96 (0.92 – 1.01) | 1.03 (0.99 – 1.08) | 1.01 (0.96 – 1.06) | 0.99 (0.94 – 1.04) |
| – 90 / 85                                                                                               | 784,313   | 3,444 | 6,448,451                            | 0.53      | 1 (reference)                             | 1 (reference)      | 1 (reference)      | 1 (reference)      | 1 (reference)      | 1 (reference)      |
| – 95 / 90                                                                                               | 453,306   | 2,266 | 3,717,557                            | 0.61      | 1.14 (1.08 – 1.20)                        | 1.02 (0.97 – 1.08) | 1.02 (0.96 – 1.08) | 0.96 (0.91 – 1.01) | 0.98 (0.93 – 1.03) | 0.99 (0.94 – 1.05) |

|            |         |       |           |      |                    |                    |                    |                    |                    |                    |
|------------|---------|-------|-----------|------|--------------------|--------------------|--------------------|--------------------|--------------------|--------------------|
| – 100 / 95 | 198,384 | 1,146 | 1,623,538 | 0.71 | 1.32 (1.24 – 1.41) | 1.15 (1.08 – 1.23) | 1.15 (1.08 – 1.23) | 1.02 (0.95 – 1.09) | 1.06 (0.99 – 1.13) | 1.09 (1.02 – 1.16) |
| ≥ 100 / 95 | 106,675 | 734   | 869,627   | 0.84 | 1.58 (1.46 – 1.71) | 1.48 (1.36 – 1.60) | 1.46 (1.35 – 1.58) | 1.2 (1.11 – 1.30)  | 1.27 (1.17 – 1.38) | 1.31 (1.21 – 1.42) |

Incidence is per 1,000 person-years follow-up.

BMI: body-mass-index; SCA: sudden cardiac arrest;  $\gamma$ -GTP: gamma-glutamyltransferase.

Multivariate model 1: adjusted for age and sex.

Multivariate model 2: adjusted for model 1 plus smoking, alcohol, regular exercise, and income.

Multivariate model 3: adjusted for model 2 plus hypertension, diabetes mellitus, dyslipidemia.

Multivariate model 4: adjusted for model 2 plus hypertension, diabetes mellitus, dyslipidemia, and chronic kidney disease.

Multivariate model 5: adjusted for model 4 plus  $\gamma$ -GTP.
